# Supplementary material
Source: MDPI journal article supplement (https://www.mdpi.com/2076-3417/12/3/1384)
Supplement: s1 [file s1]

## Supplementary tables

**Table S1.** Parameters and their levels used to optimize the production of Ag/CuO NPs with RSM model and the yield of Ag/CuO NPs in different treatments.

| Run Order | Extract (mg) | Concentration (mM) | Microwave power (W) | Time (min) | Yield (mg) | FITS1 |
|-----------|--------------|--------------------|---------------------|------------|------------|-------|
| 1         | 1.5          | 0.5                | 350                 | 15         | 19.5       | 17.7  |
| 2         | 1            | 0.5                | 350                 | 10         | 15         | 15.8  |
| 3         | 0.5          | 1                  | 500                 | 15         | 21.5       | 22.1  |
| 4         | 1.5          | 1                  | 350                 | 20         | 20.4       | 21    |
| 5         | 1.5          | 1                  | 500                 | 15         | 21         | 22.3  |
| 6         | 0.5          | 1                  | 350                 | 10         | 17.6       | 18.3  |
| 7         | 1            | 1                  | 350                 | 15         | 29.8       | 29.2  |
| 8         | 1            | 1                  | 350                 | 15         | 29.8       | 29.2  |
| 9         | 1            | 1                  | 500                 | 20         | 28.2       | 25.7  |
| 10        | 1            | 0.5                | 350                 | 20         | 16         | 16.7  |
| 11        | 1            | 1.5                | 500                 | 15         | 28.3       | 29.3  |
| 12        | 1            | 1.5                | 350                 | 10         | 26.7       | 27.5  |
| 13        | 0.5          | 0.5                | 350                 | 15         | 16         | 14.2  |
| 14        | 1            | 1.5                | 350                 | 20         | 29.6       | 30.3  |
| 15        | 1.5          | 1                  | 200                 | 15         | 20         | 20.8  |
| 16        | 1            | 1                  | 200                 | 20         | 19.6       | 18.9  |
| 17        | 1            | 1.5                | 200                 | 15         | 28.7       | 28.3  |
| 18        | 0.5          | 1.5                | 350                 | 15         | 30.5       | 29.5  |
| 19        | 1            | 0.5                | 200                 | 15         | 14.2       | 14.6  |
| 20        | 1            | 1                  | 500                 | 10         | 21.3       | 19.2  |
| 21        | 1            | 1                  | 200                 | 10         | 22         | 21.7  |
| 22        | 1.5          | 1.5                | 350                 | 15         | 28.7       | 27.7  |
| 23        | 0.5          | 1                  | 200                 | 15         | 19.2       | 19.4  |
| 24        | 1            | 1                  | 350                 | 15         | 28         | 29.2  |
| 25        | 1            | 0.5                | 500                 | 15         | 16         | 17.8  |
| 26        | 1.5          | 1                  | 350                 | 10         | 22.1       | 22.2  |
| 27        | 0.5          | 1                  | 350                 | 20         | 22         | 23.2  |

**Table S2.** ANOVA table of the final RSM model.

| Source                              | DF | Adj SS  | Adj MS  | F-Value | P-Value |
|-------------------------------------|----|---------|---------|---------|---------|
| Model                               | 14 | 698.126 | 49.866  | 17.96   | 0       |
| Linear                              | 4  | 504.302 | 126.075 | 45.4    | 0       |
| Extract                             | 1  | 2.001   | 2.001   | 0.72    | 0.413   |
| Concentration                       | 1  | 478.803 | 478.803 | 172.43  | 0       |
| Microwave power                     | 1  | 13.23   | 13.23   | 4.76    | 0.05    |
| Time                                | 1  | 10.268  | 10.268  | 3.7     | 0.079   |
| Square                              | 4  | 153.342 | 38.335  | 13.81   | 0       |
| Extract *Extract                    | 1  | 90.75   | 90.75   | 32.68   | 0       |
| Concentration * Concentration       | 1  | 41.441  | 41.441  | 14.92   | 0.002   |
| Microwave power<br>*Microwave power | 1  | 82.688  | 82.688  | 29.78   | 0       |
| Time *Time                          | 1  | 80.083  | 80.083  | 28.84   | 0       |
| 2-Way Interaction                   | 6  | 40.483  | 6.747   | 2.43    | 0.09    |
| Extract *Concentration              | 1  | 7.023   | 7.023   | 2.53    | 0.138   |
| Extract *Microwave power            | 1  | 0.423   | 0.423   | 0.15    | 0.703   |
| Extract *Time                       | 1  | 9.302   | 9.302   | 3.35    | 0.092   |
| Concentration *Microwave<br>power   | 1  | 1.21    | 1.21    | 0.44    | 0.522   |
| Concentration *Time                 | 1  | 0.903   | 0.903   | 0.33    | 0.579   |
| Microwave power *Time               | 1  | 21.623  | 21.623  | 7.79    | 0.016   |
| Error                               | 12 | 33.321  | 2.777   |         |         |
| Lack-of-Fit                         | 10 | 31.161  | 3.116   | 2.89    | 0.285   |
| Pure Error                          | 2  | 2.16    | 1.08    |         |         |
| Total                               | 26 | 731.447 |         |         |         |
